# Supplementary material for: The Mental Representation of Social Connections: Generalizability Extended to Beijing Adults
Source: PLOS journal article supplement (doi:10.1371/journal.pone.0044065), 2012-09-11
Supplement: S1 (10.1371/journal.pone.0044065.s001) [file journal.pone.0044065.s001.pdf › journal.pone.0044065.s001.pdf]

# Notes

|                |                           |                                                                         |
|----------------|---------------------------|-------------------------------------------------------------------------|
| Output Created | 13-Feb-2012 16:23:08      |                                                                         |
| Comments       |                           |                                                                         |
| Input          | Data                      | C:\Users\Louise                                                         |
|                |                           | Hawkley\Documents\lhawkley\MyPubs\                                      |
|                |                           | Beijing Collaboration_UCLA Factor                                       |
|                |                           | Analyses\UCLA_US Younger                                                |
|                |                           | Adults.sav                                                              |
|                | Active Dataset            | DataSet3                                                                |
|                | Filter                    | <none>                                                                  |
|                | Weight                    | <none>                                                                  |
|                | Split File                | <none>                                                                  |
|                | N of Rows in Working Data | 135                                                                     |
|                | File                      |                                                                         |
| Syntax         |                           | ALSCAL                                                                  |
|                |                           | /MATRIX=IN('C:\Users\LOUISE~1\AppData\Local\Temp\spss376\spssalsc.tmp') |
|                |                           | /LEVEL=ORDINAL                                                          |
|                |                           | /CONDITION=MATRIX                                                       |
|                |                           | /MODEL=EUCLID                                                           |
|                |                           | /CRITERIA=CONVERGE(0.001)                                               |
|                |                           | STRESSMIN(0.005) ITER(30)                                               |
|                |                           | CUTOFF(0) DIMENS(2,3)                                                   |
|                |                           | /PLOT=DEFAULT ALL                                                       |
|                |                           | /PRINT=HEADER.                                                          |
| Resources      | Processor Time            | 00 00:00:02.169                                                         |
|                | Elapsed Time              | 00 00:00:02.121                                                         |

## Derived Stimulus Configuration

### Euclidean distance model

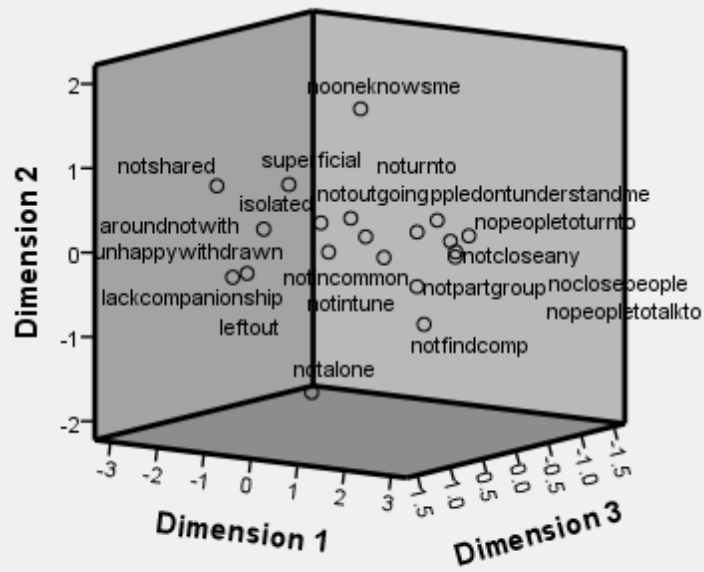

## Derived Stimulus Configuration

### Euclidean distance model

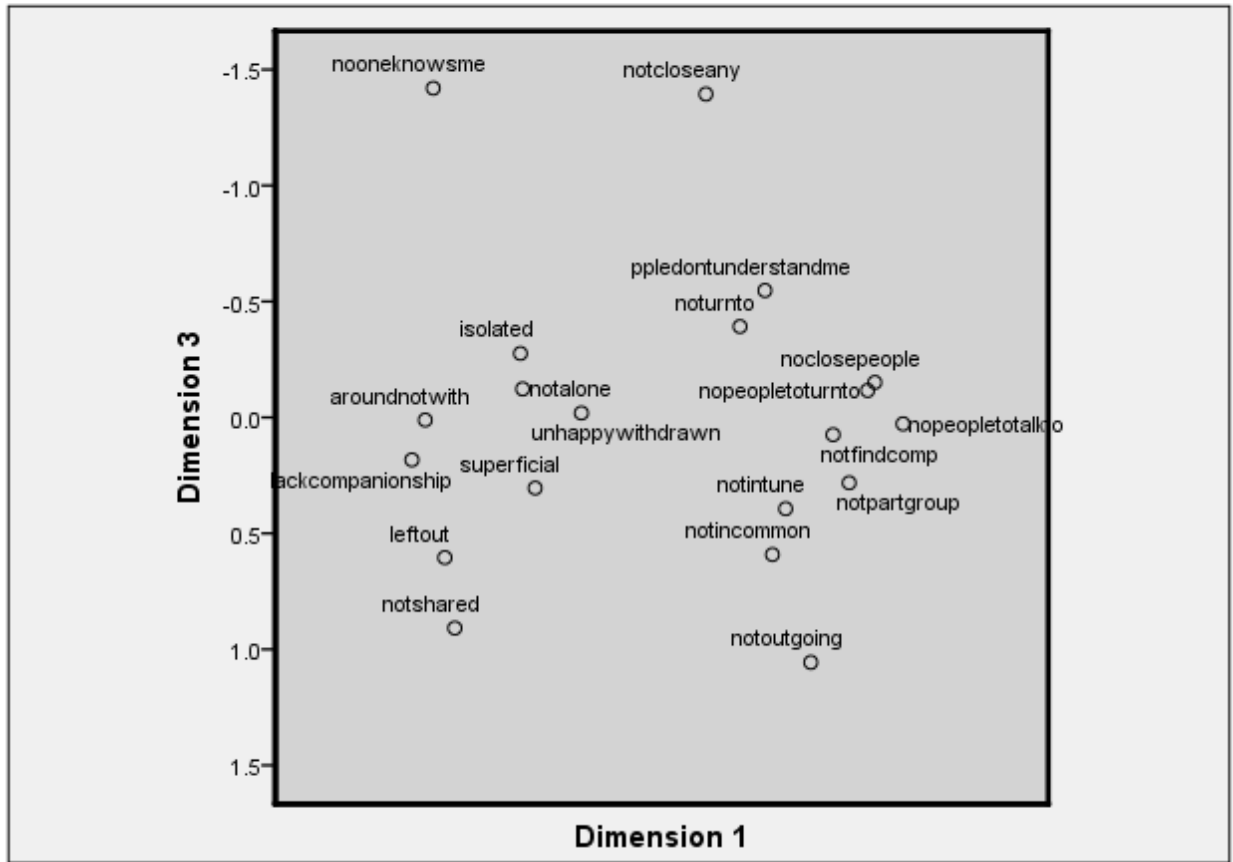

## Derived Stimulus Configuration

### Euclidean distance model

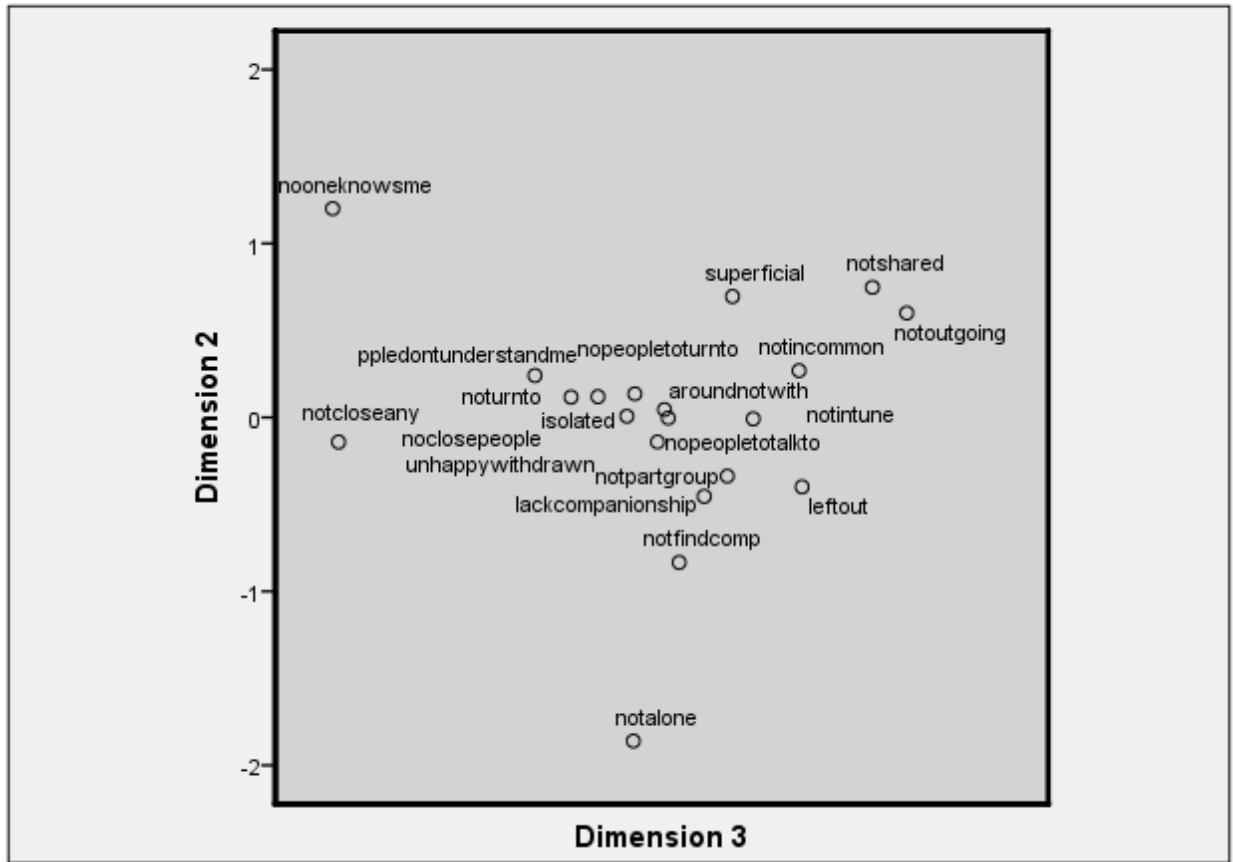

## Derived Stimulus Configuration

### Euclidean distance model

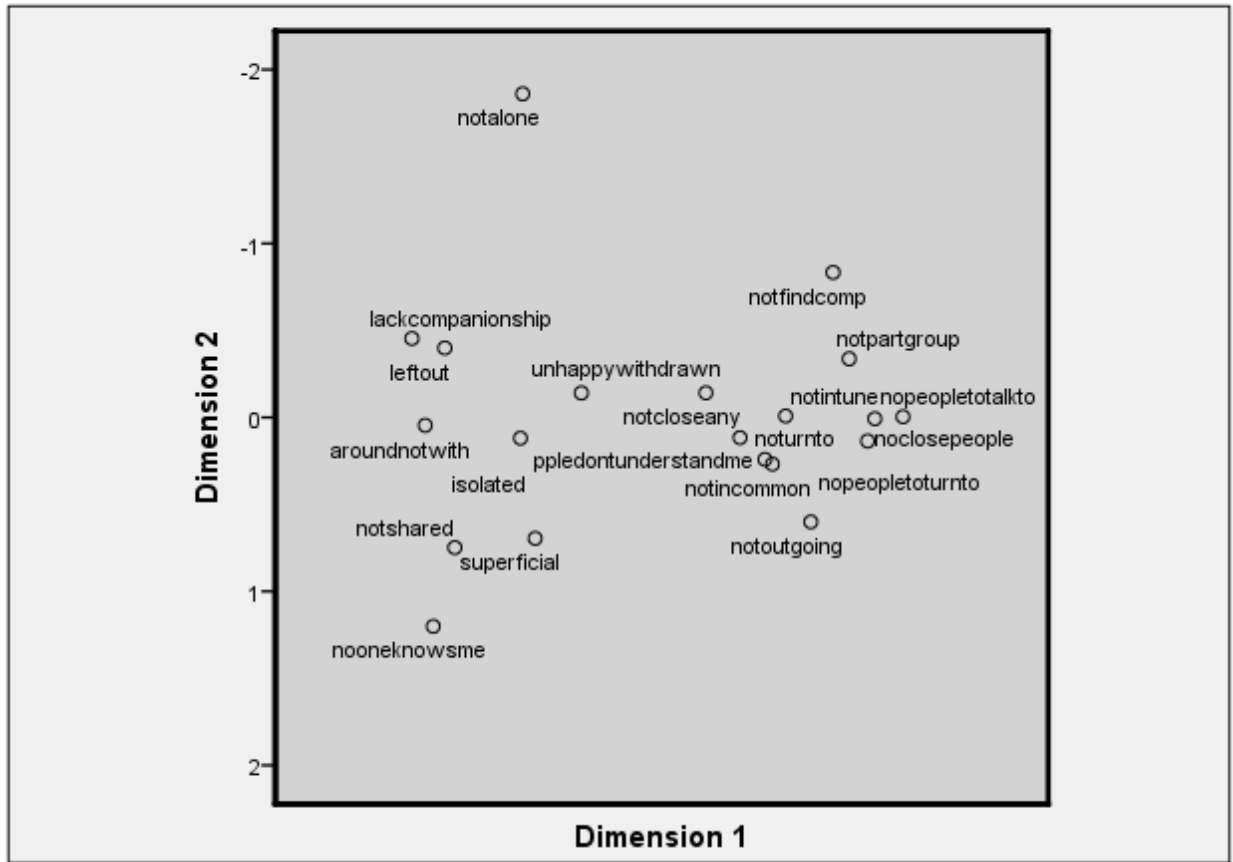

Scatterplot of Linear Fit  
Euclidean distance model

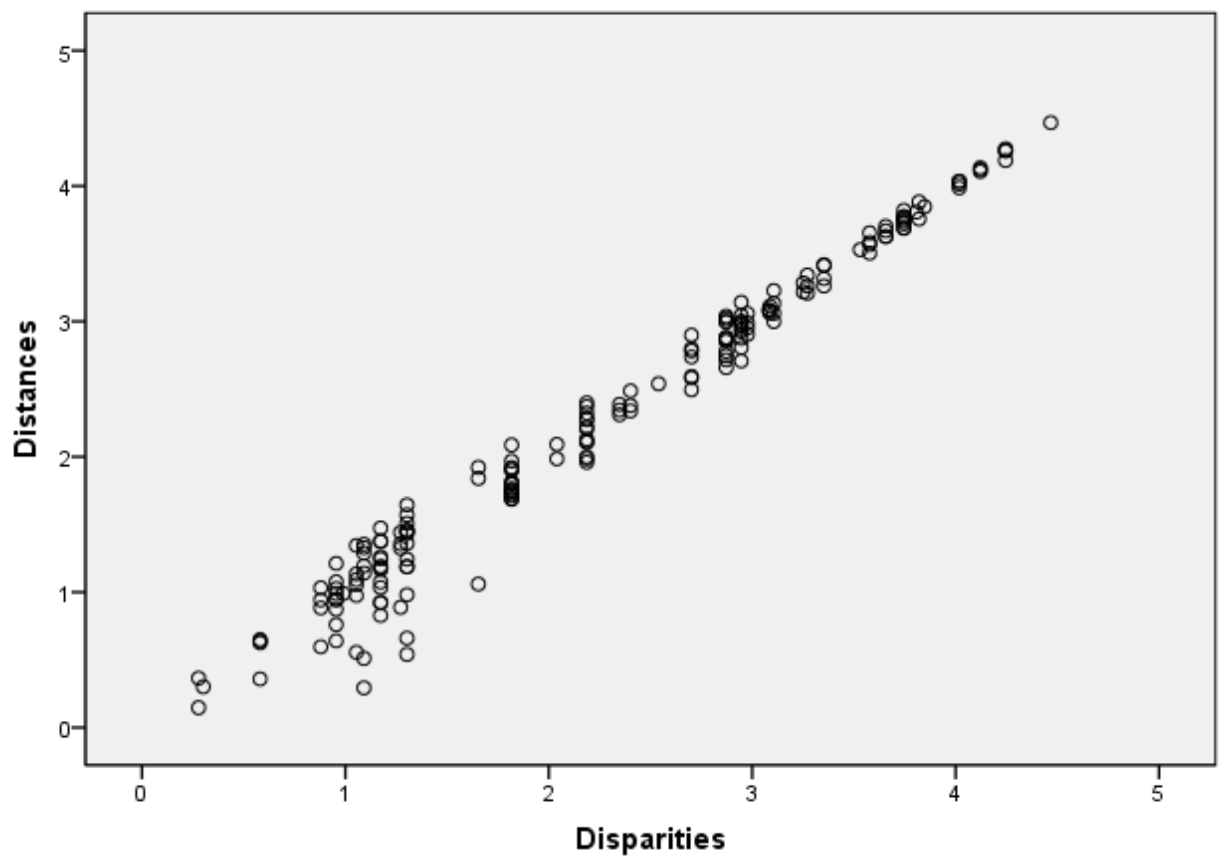

**Scatterplot of Nonlinear Fit**

**Euclidean distance model**

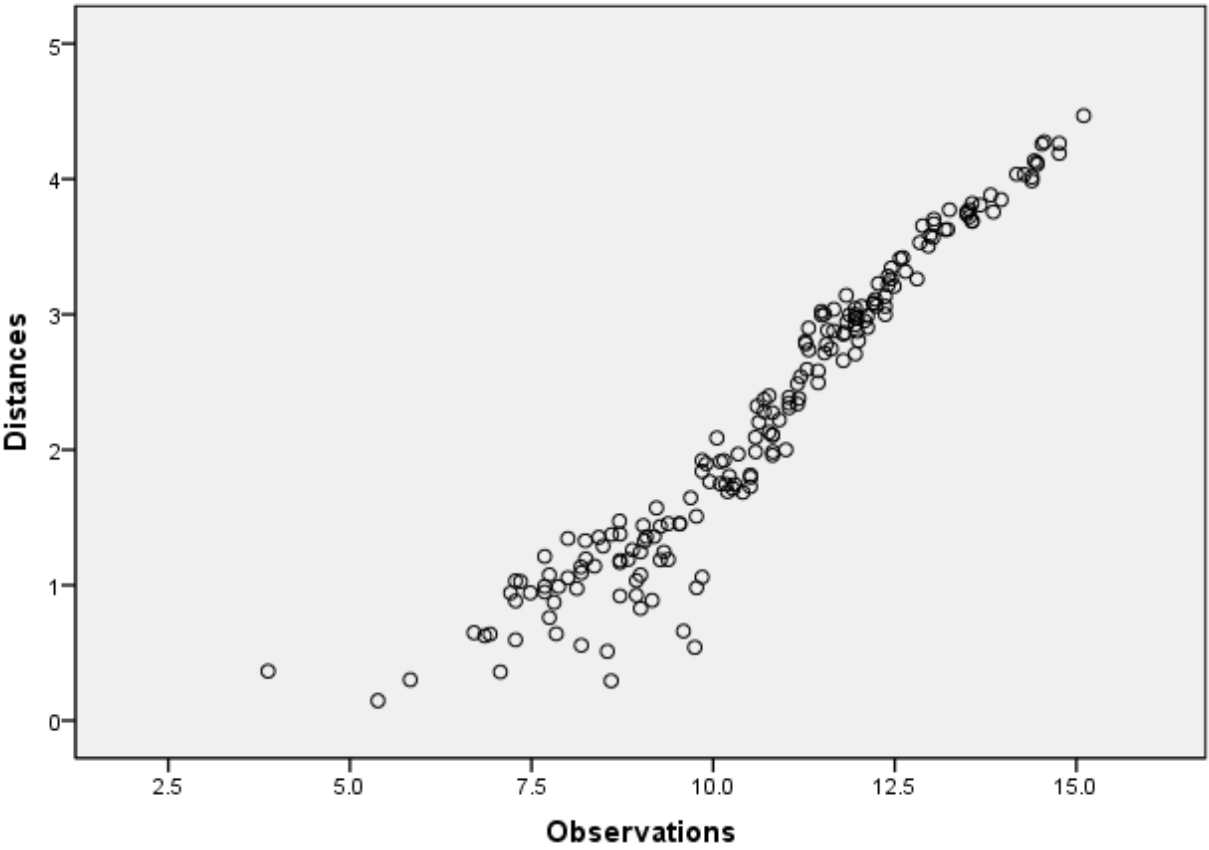

Transformation Scatterplot  
Euclidean distance model

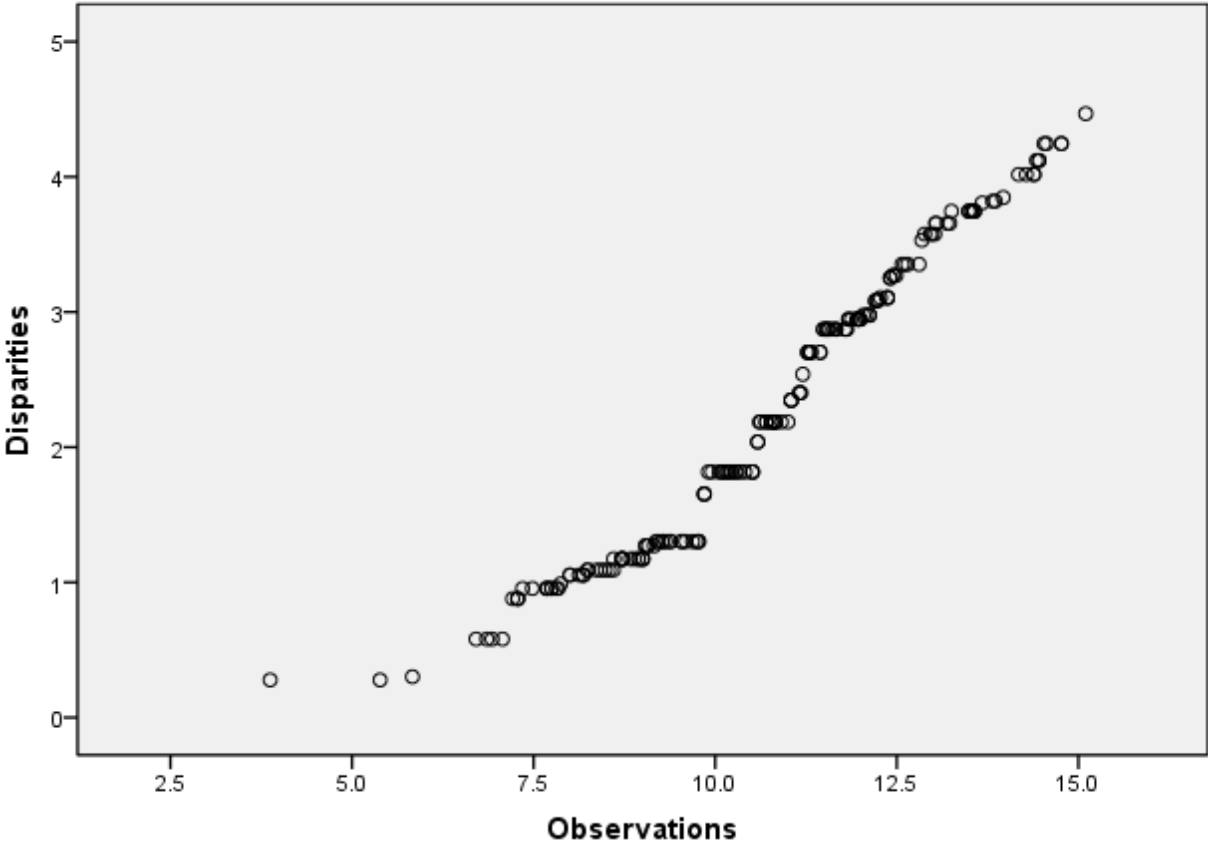



## Derived Stimulus Configuration

### Euclidean distance model

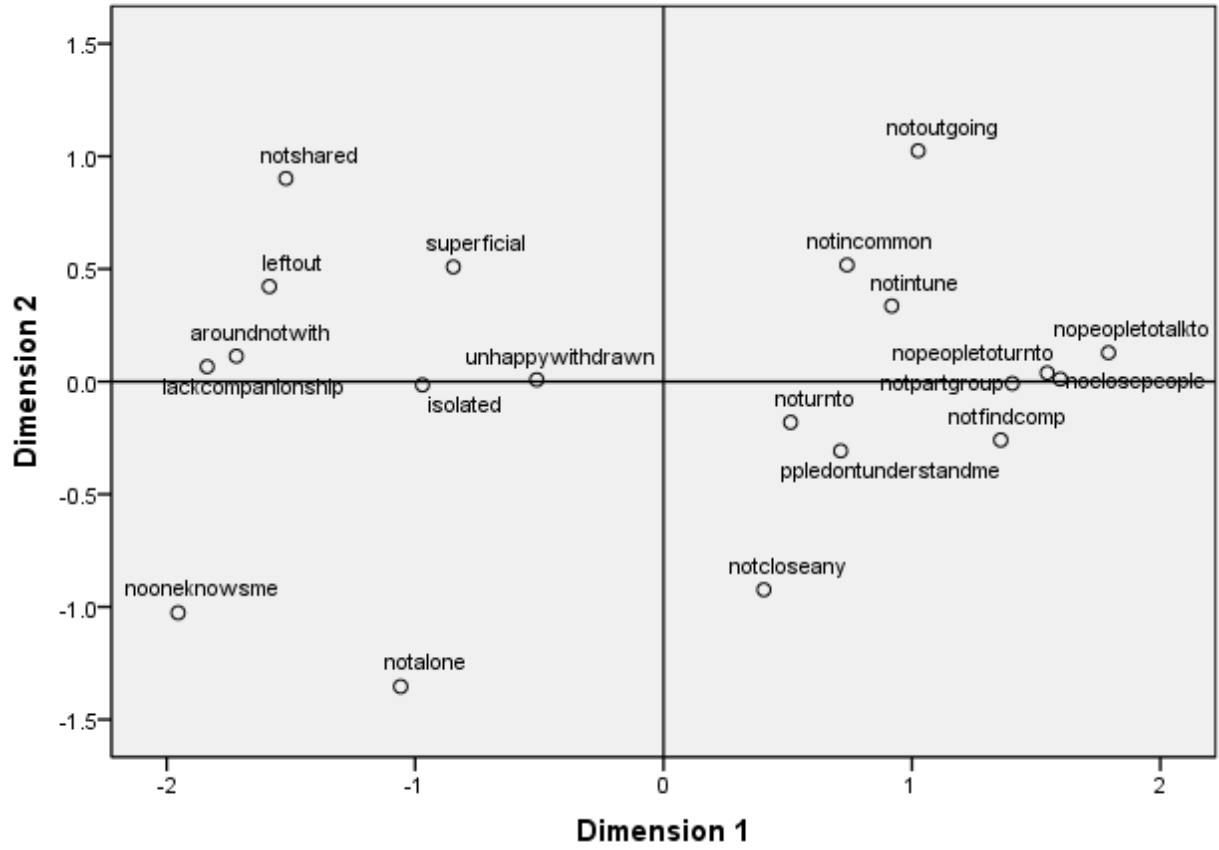

Scatterplot of Linear Fit  
Euclidean distance model

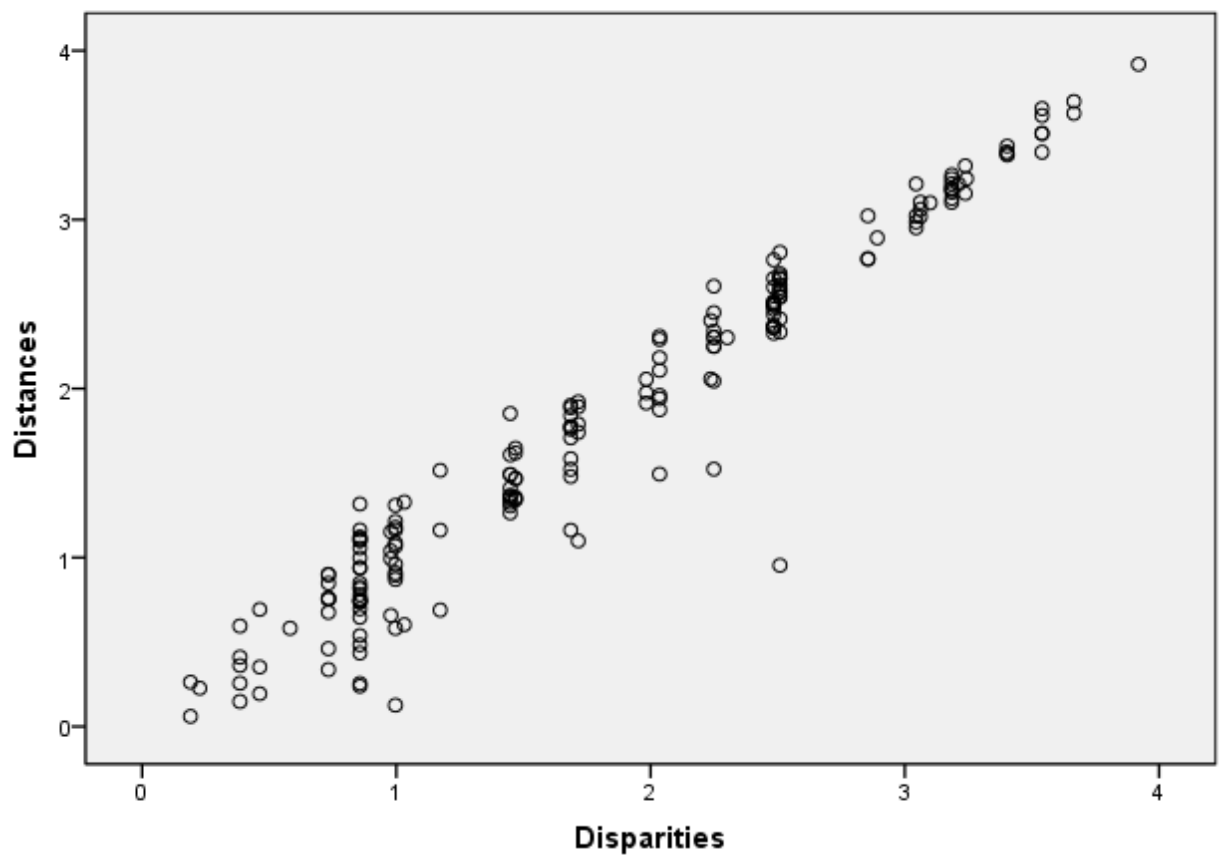

**Scatterplot of Nonlinear Fit**

**Euclidean distance model**

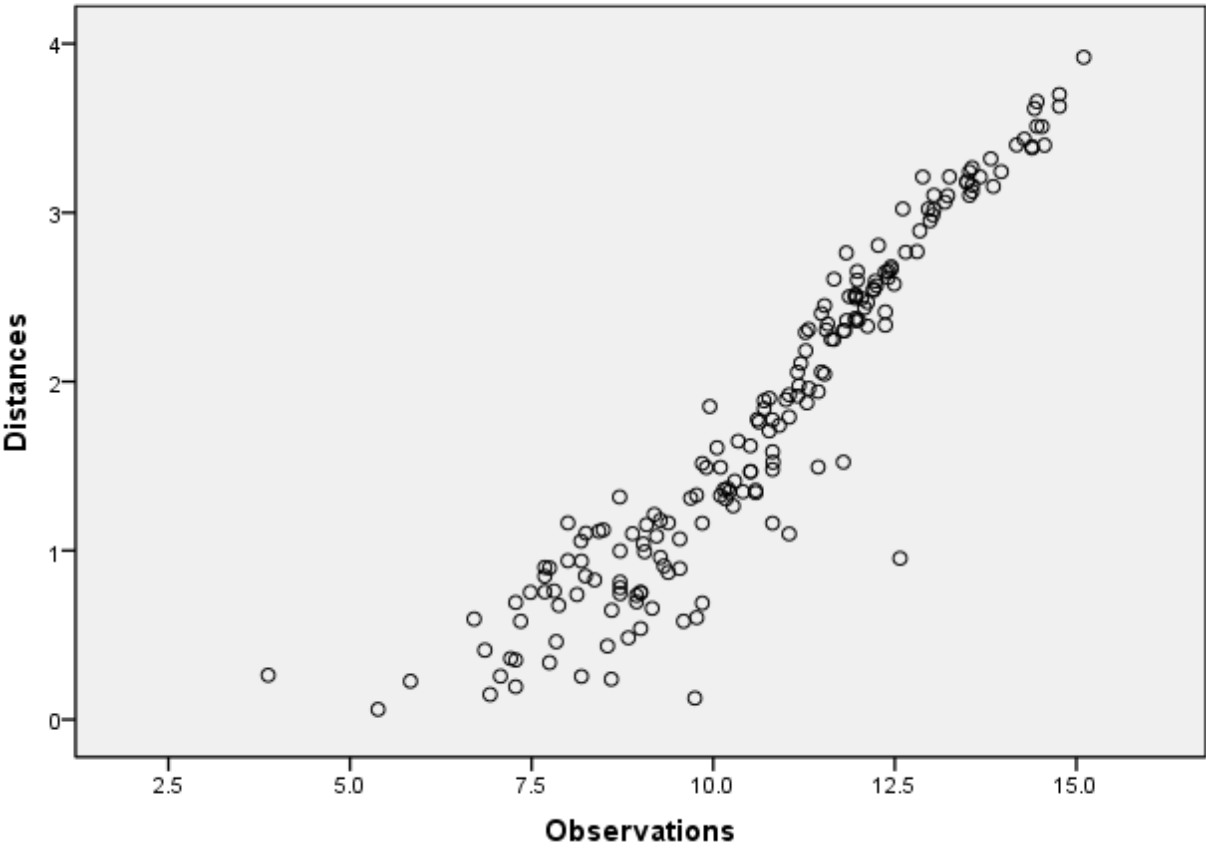

Transformation Scatterplot  
Euclidean distance model

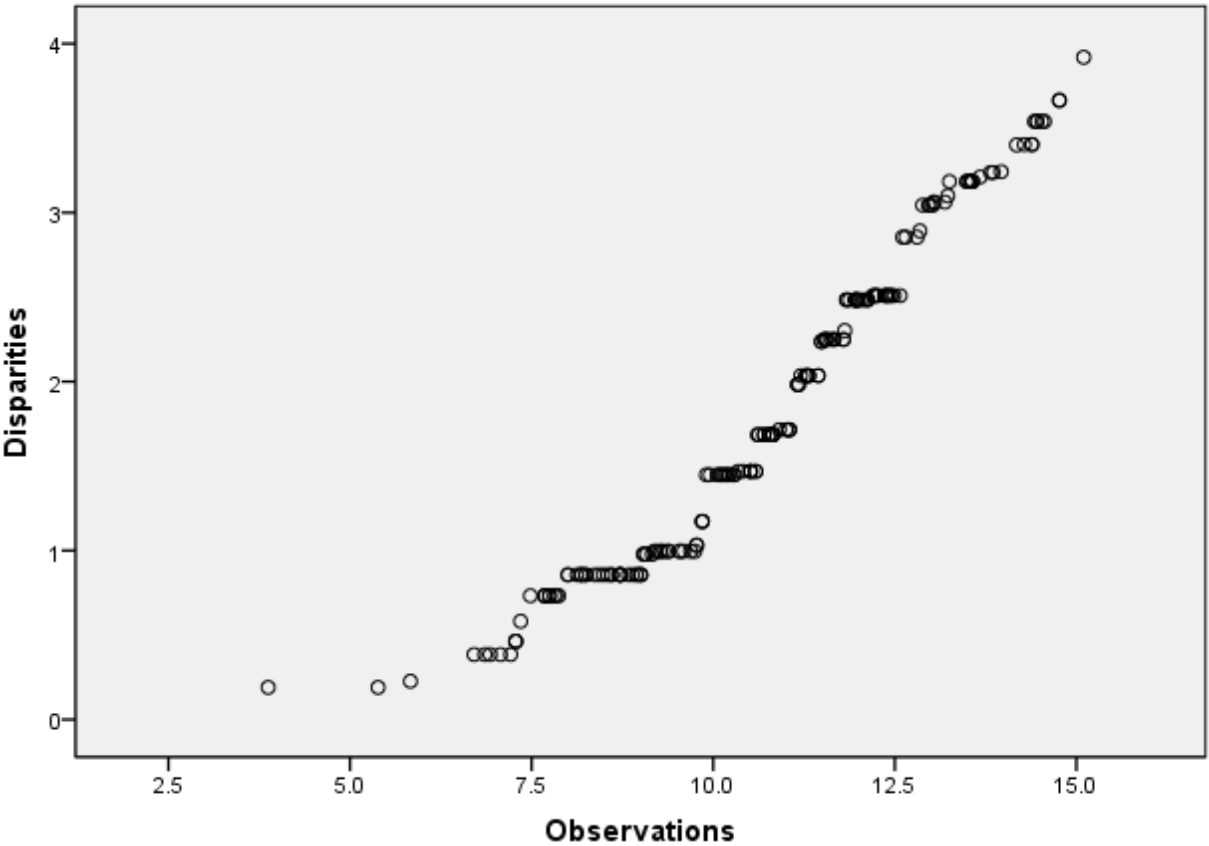

## Alscal Procedure Options

### Data Options-

|                                       |               |
|---------------------------------------|---------------|
| Number of Rows (Observations/Matrix). | 20            |
| Number of Columns (Variables) . . . . | 20            |
| Number of Matrices . . . . .          | 1             |
| Measurement Level . . . . .           | Ordinal       |
| Data Matrix Shape . . . . .           | Symmetric     |
| Type . . . . .                        | Dissimilarity |
| Approach to Ties . . . . .            | Leave Tied    |
| Conditionality . . . . .              | Matrix        |
| Data Cutoff at . . . . .              | .000000       |

### Model Options-

|                                  |               |
|----------------------------------|---------------|
| Model . . . . .                  | Euclid        |
| Maximum Dimensionality . . . . . | 3             |
| Minimum Dimensionality . . . . . | 2             |
| Negative Weights . . . . .       | Not Permitted |

### Output Options-

|                                      |             |
|--------------------------------------|-------------|
| Job Option Header . . . . .          | Printed     |
| Data Matrices . . . . .              | Not Printed |
| Configurations and Transformations . | Plotted     |
| Output Dataset . . . . .             | Not Created |
| Initial Stimulus Coordinates . . . . | Computed    |

### Algorithmic Options-

|                                     |          |
|-------------------------------------|----------|
| Maximum Iterations . . . . .        | 30       |
| Convergence Criterion . . . . .     | .00100   |
| Minimum S-stress . . . . .          | .00500   |
| Missing Data Estimated by . . . . . | Ulbounds |
| Tiestore . . . . .                  | 190      |

Iteration history for the 3 dimensional solution (in squared distances)

Young's S-stress formula 1 is used.

| Iteration | S-stress | Improvement |
|-----------|----------|-------------|
| 1         | .09984   |             |
| 2         | .06869   | .03116      |
| 3         | .06336   | .00533      |
| 4         | .06173   | .00163      |
| 5         | .06115   | .00058      |

Iterations stopped because  
S-stress improvement is less than .001000

Stress and squared correlation (RSQ) in distances

RSQ values are the proportion of variance of the scaled data (disparities)  
in the partition (row, matrix, or entire data) which  
is accounted for by their corresponding distances.  
Stress values are Kruskal's stress formula 1.

For matrix  
Stress = .06764 RSQ = .97607

Configuration derived in 3 dimensions  
Stimulus Coordinates

| Stimulus<br>Number | Stimulus<br>Name | Dimension |         |         |
|--------------------|------------------|-----------|---------|---------|
|                    |                  | 1         | 2       | 3       |
| 1                  | notintun         | 1.0677    | -.0083  | .3938   |
| 2                  | lackcomp         | -2.1559   | -.4537  | .1830   |
| 3                  | noturnto         | .6736     | .1164   | -.3920  |
| 4                  | notalone         | -1.2009   | -1.8603 | -.1226  |
| 5                  | notpartg         | 1.6158    | -.3372  | .2820   |
| 6                  | notincom         | .9535     | .2688   | .5914   |
| 7                  | notclose         | .3799     | -.1414  | -1.3942 |
| 8                  | notshare         | -1.7859   | .7481   | .9082   |
| 9                  | notoutgo         | 1.2850    | .6005   | 1.0564  |
| 10                 | noclosep         | 1.8376    | .0072   | -.1510  |
| 11                 | leftout          | -1.8722   | -.3994  | .6045   |
| 12                 | superfic         | -1.0928   | .6955   | .3045   |
| 13                 | noonekno         | -1.9713   | 1.2009  | -1.4196 |
| 14                 | isolated         | -1.2197   | .1192   | -.2759  |

|    |          |         |        |        |
|----|----------|---------|--------|--------|
| 15 | notfindc | 1.4769  | -.8339 | .0748  |
| 16 | ppledont | .8891   | .2412  | -.5472 |
| 17 | unhappyw | -.6944  | -.1409 | -.0187 |
| 18 | aroundno | -2.0411 | .0454  | .0111  |
| 19 | nopeople | 2.0802  | -.0036 | .0276  |
| 20 | nopeop_1 | 1.7751  | .1356  | -.1162 |

Iteration history for the 2 dimensional solution (in squared distances)

Young's S-stress formula 1 is used.

| Iteration | S-stress | Improvement |
|-----------|----------|-------------|
| 1         | .18812   |             |
| 2         | .13030   | .05781      |
| 3         | .12515   | .00515      |
| 4         | .12365   | .00150      |
| 5         | .12294   | .00071      |

Iterations stopped because  
S-stress improvement is less than .001000

Stress and squared correlation (RSQ) in distances

RSQ values are the proportion of variance of the scaled data (disparities)  
in the partition (row, matrix, or entire data) which  
is accounted for by their corresponding distances.  
Stress values are Kruskal's stress formula 1.

For matrix  
Stress = .11252      RSQ = .94475

Configuration derived in 2 dimensions

Stimulus Coordinates  
Dimension

| Stimulus<br>Number | Stimulus<br>Name | 1       | 2       |
|--------------------|------------------|---------|---------|
| 1                  | notintun         | .9185   | .3358   |
| 2                  | lackcomp         | -1.8375 | .0661   |
| 3                  | noturnto         | .5114   | -.1808  |
| 4                  | notalone         | -1.0584 | -1.3536 |
| 5                  | notpartg         | 1.4041  | -.0082  |
| 6                  | notincom         | .7383   | .5176   |

|    |          |         |         |
|----|----------|---------|---------|
| 7  | notclose | .4037   | -.9238  |
| 8  | notshare | -1.5201 | .9013   |
| 9  | notoutgo | 1.0247  | 1.0241  |
| 10 | noclosep | 1.5974  | .0107   |
| 11 | leftout  | -1.5869 | .4220   |
| 12 | superfic | -.8464  | .5089   |
| 13 | noonekno | -1.9541 | -1.0262 |
| 14 | isolated | -.9706  | -.0148  |
| 15 | notfindc | 1.3574  | -.2593  |
| 16 | ppledont | .7129   | -.3079  |
| 17 | unhappyw | -.5104  | .0084   |
| 18 | aroundno | -1.7198 | .1125   |
| 19 | nopeople | 1.7913  | .1281   |
| 20 | nopeop_1 | 1.5445  | .0389   |

| Abbreviated<br>Name | Extended<br>Name     |
|---------------------|----------------------|
| aroundno            | aroundnotwith        |
| lackcomp            | lackcompanionship    |
| noclosep            | noclosepeople        |
| noonekno            | nooneknowsme         |
| nopeop_1            | nopeopletoturnto     |
| nopeople            | nopeopletotalkto     |
| notclose            | notcloseany          |
| notfindc            | notfindcomp          |
| notincom            | notincommon          |
| notintun            | notintune            |
| notoutgo            | notoutgoing          |
| notpartg            | notpartgroup         |
| notshare            | notshared            |
| ppledont            | ppledontunderstandme |
| superfic            | superficial          |
| unhappyw            | unhappywithdrawn     |
