# Supplementary material for: The Mental Representation of Social Connections: Generalizability Extended to Beijing Adults
Source: PLOS journal article supplement (doi:10.1371/journal.pone.0044065), 2012-09-11
Supplement: S3 (10.1371/journal.pone.0044065.s003) [file journal.pone.0044065.s003.pdf › journal.pone.0044065.s003.pdf]

Notes

|                |                                                                                                                                                                                                                                                                              |                                                                                                                                           |
|----------------|------------------------------------------------------------------------------------------------------------------------------------------------------------------------------------------------------------------------------------------------------------------------------|-------------------------------------------------------------------------------------------------------------------------------------------|
| Output Created | 13-Feb-2012 16:06:17                                                                                                                                                                                                                                                         |                                                                                                                                           |
| Comments       |                                                                                                                                                                                                                                                                              |                                                                                                                                           |
| Input          | Data                                                                                                                                                                                                                                                                         | C:\Users\Louise<br>Hawkley\Documents\lhawkley\MyPubs\<br>Beijing Collaboration_UCLA Factor<br>Analyses\UCLA_Beijing Younger<br>Adults.sav |
|                | Active Dataset                                                                                                                                                                                                                                                               | DataSet1                                                                                                                                  |
|                | Filter                                                                                                                                                                                                                                                                       | <none>                                                                                                                                    |
|                | Weight                                                                                                                                                                                                                                                                       | <none>                                                                                                                                    |
|                | Split File                                                                                                                                                                                                                                                                   | <none>                                                                                                                                    |
|                | N of Rows in Working Data                                                                                                                                                                                                                                                    | 267                                                                                                                                       |
|                | File                                                                                                                                                                                                                                                                         |                                                                                                                                           |
| Syntax         | ALSCAL<br><br>/MATRIX=IN('C:\Users\LOUISE~1\AppData\Local\Temp\spss376\spssalsc.tmp')<br>/LEVEL=ORDINAL<br>/CONDITION=MATRIX<br>/MODEL=EUCLID<br>/CRITERIA=CONVERGE(0.001)<br>STRESSMIN(0.005) ITER(30)<br>CUTOFF(0) DIMENS(2,3)<br>/PLOT=DEFAULT ALL<br>/PRINT=DATA HEADER. |                                                                                                                                           |
| Resources      | Processor Time                                                                                                                                                                                                                                                               | 00 00:00:04.009                                                                                                                           |
|                | Elapsed Time                                                                                                                                                                                                                                                                 | 00 00:00:03.088                                                                                                                           |

# Derived Stimulus Configuration

## Euclidean distance model

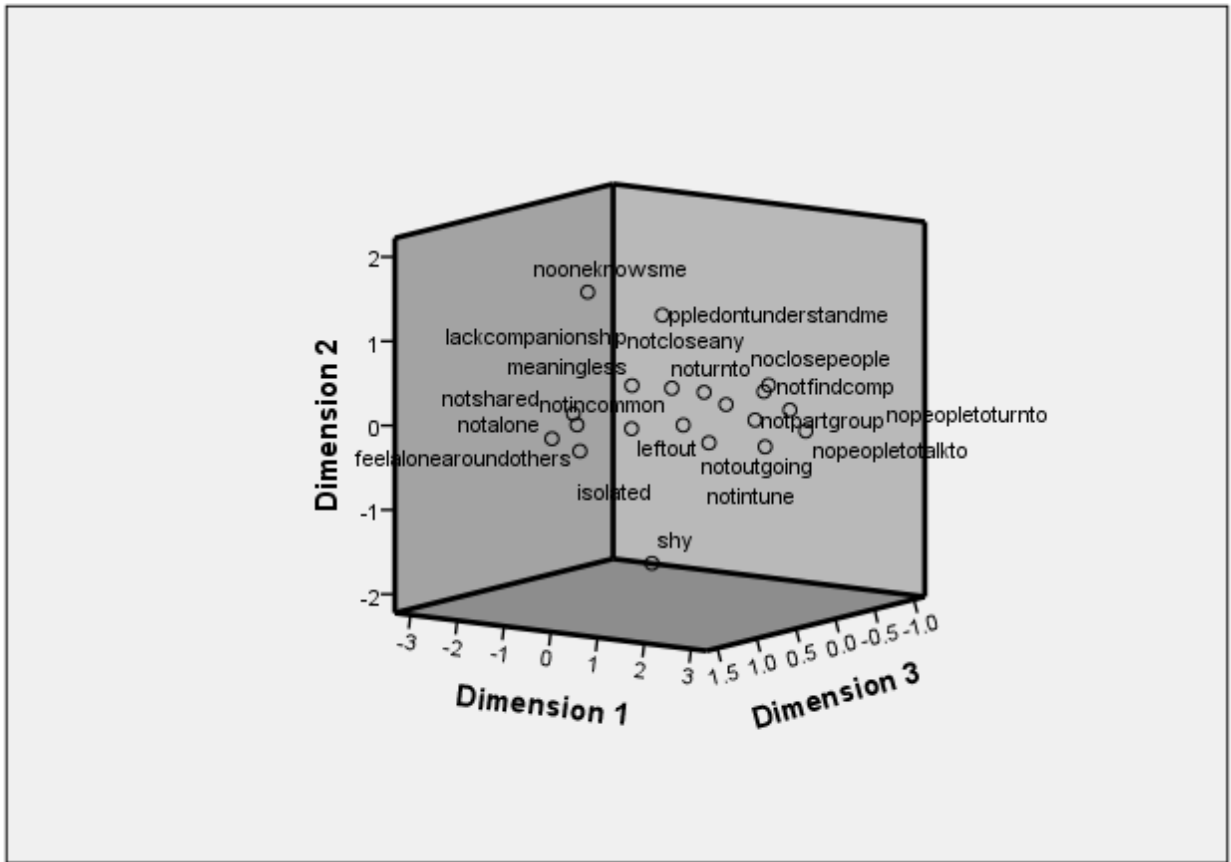

## Derived Stimulus Configuration

### Euclidean distance model

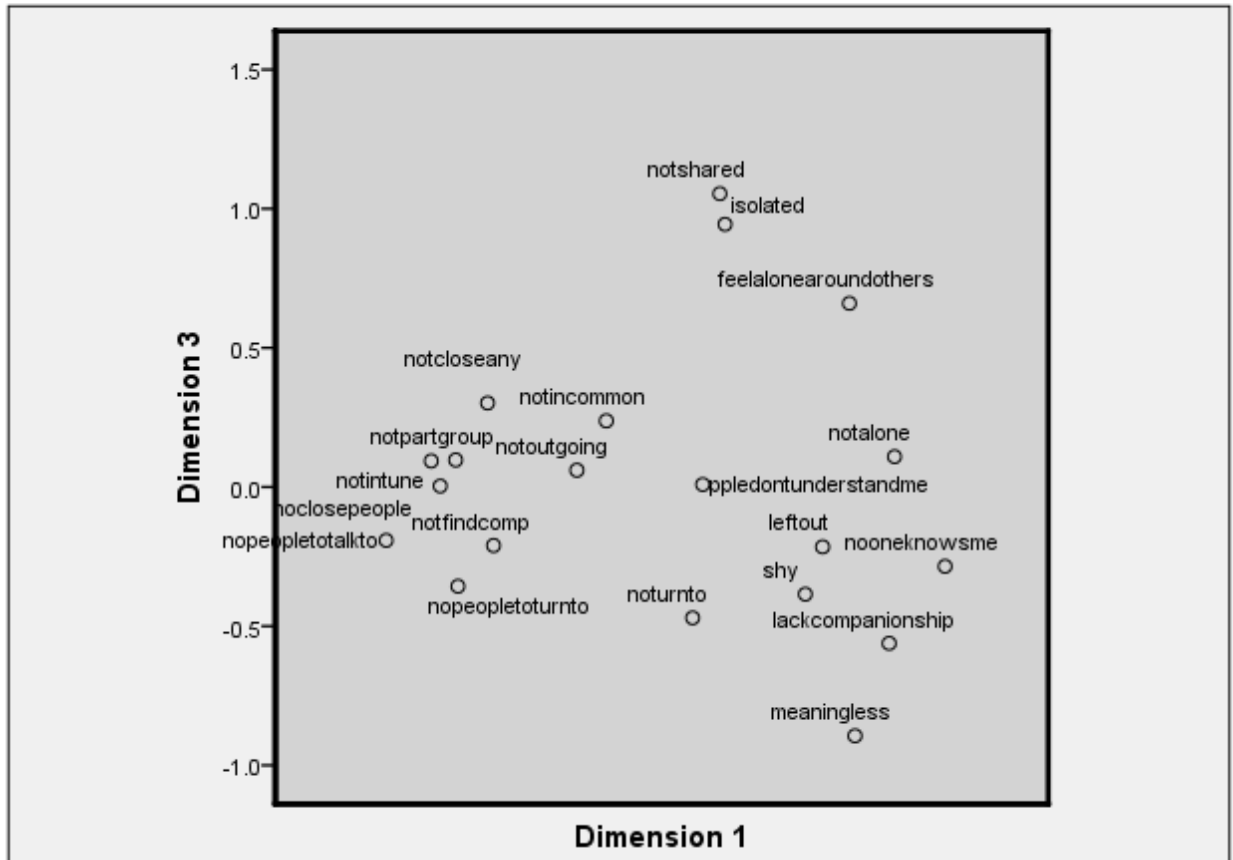

## Derived Stimulus Configuration

### Euclidean distance model

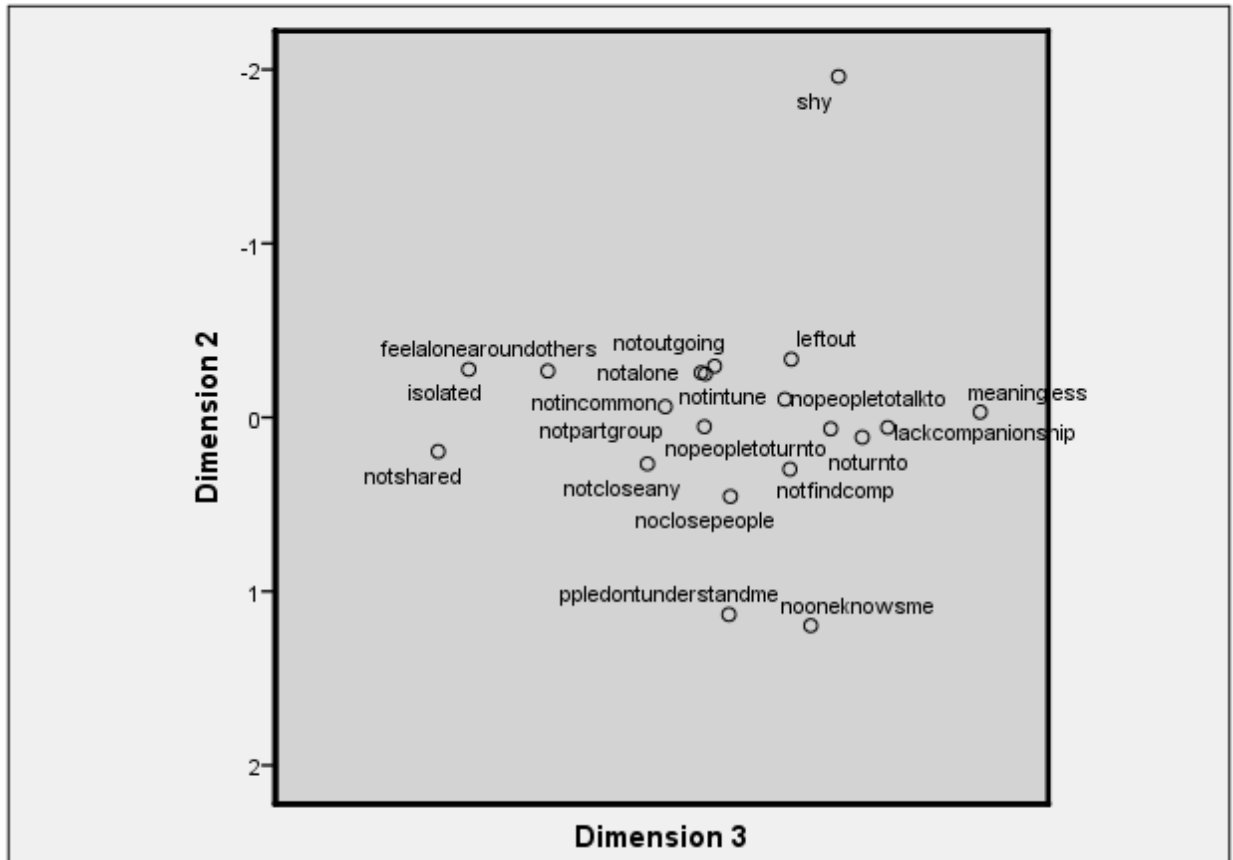

# Derived Stimulus Configuration

## Euclidean distance model

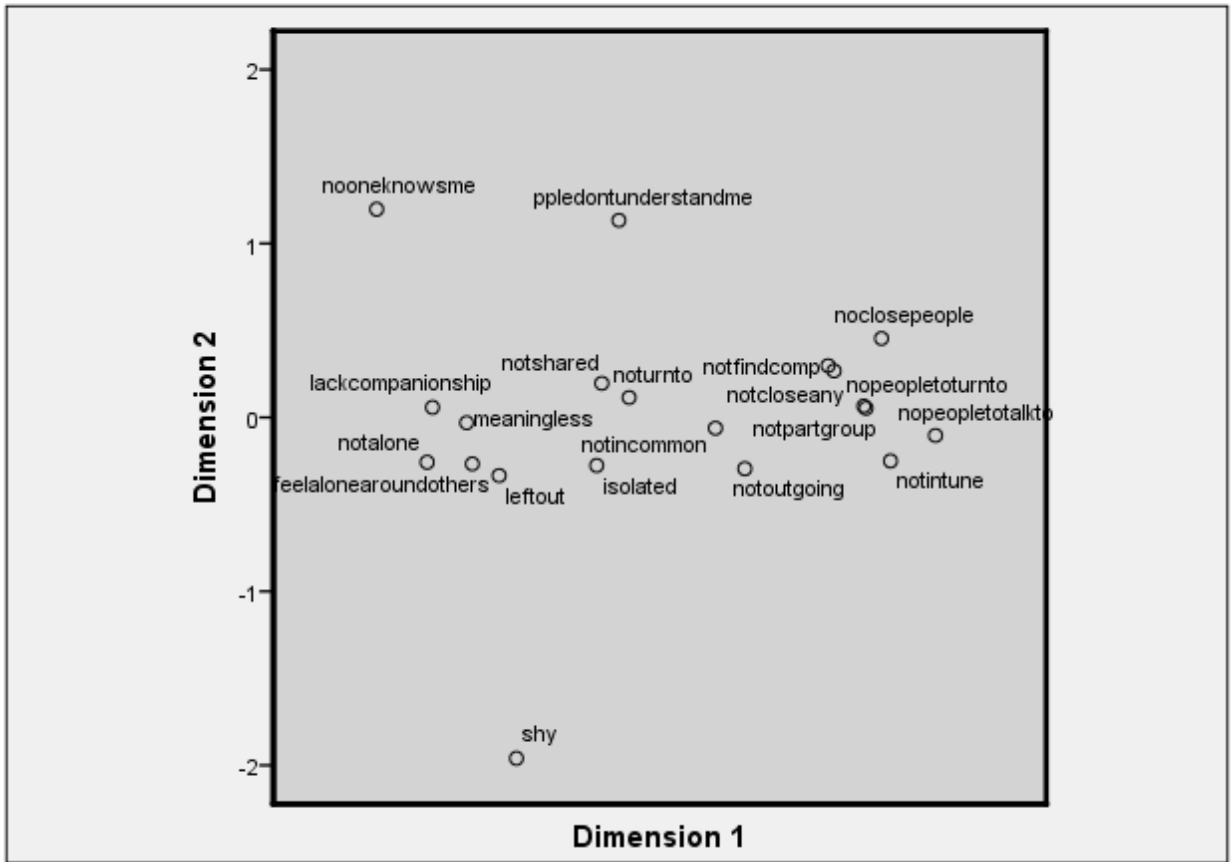

Scatterplot of Linear Fit  
Euclidean distance model

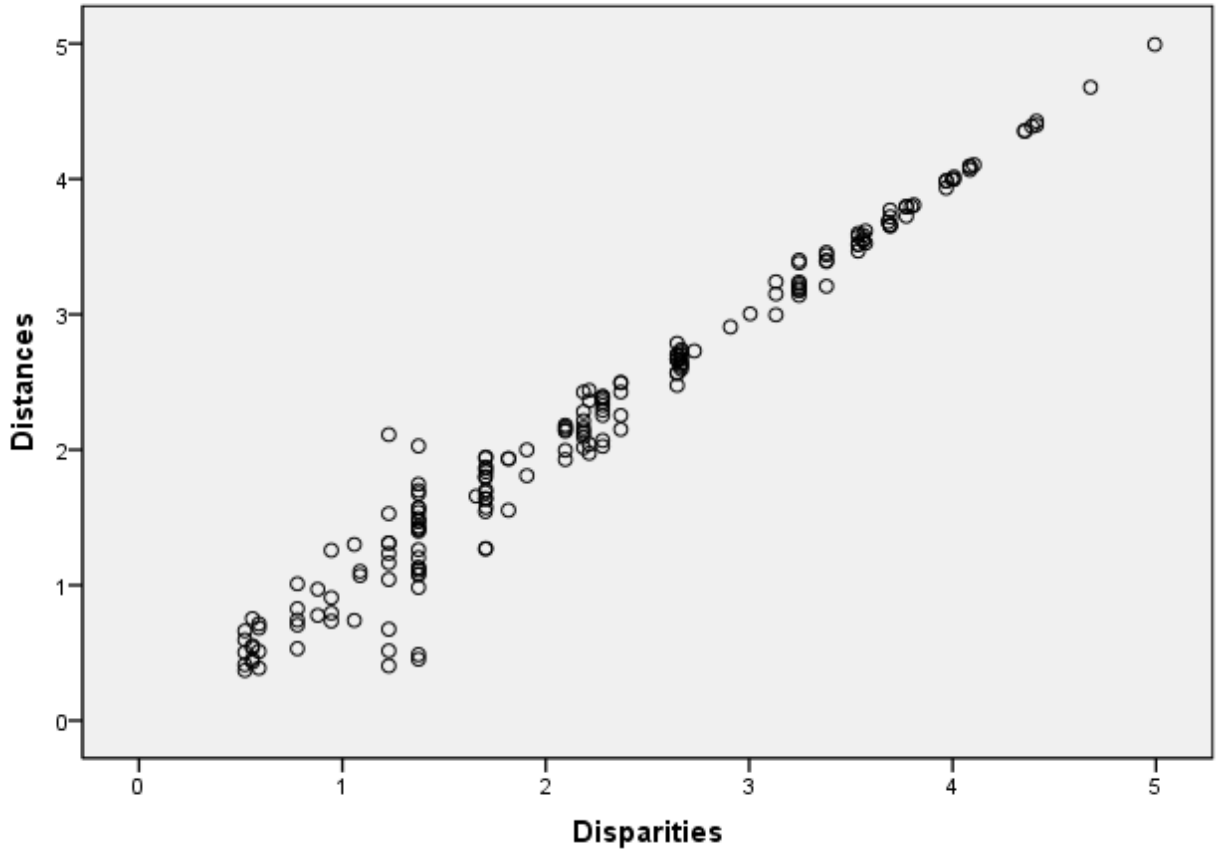

# Scatterplot of Nonlinear Fit

## Euclidean distance model

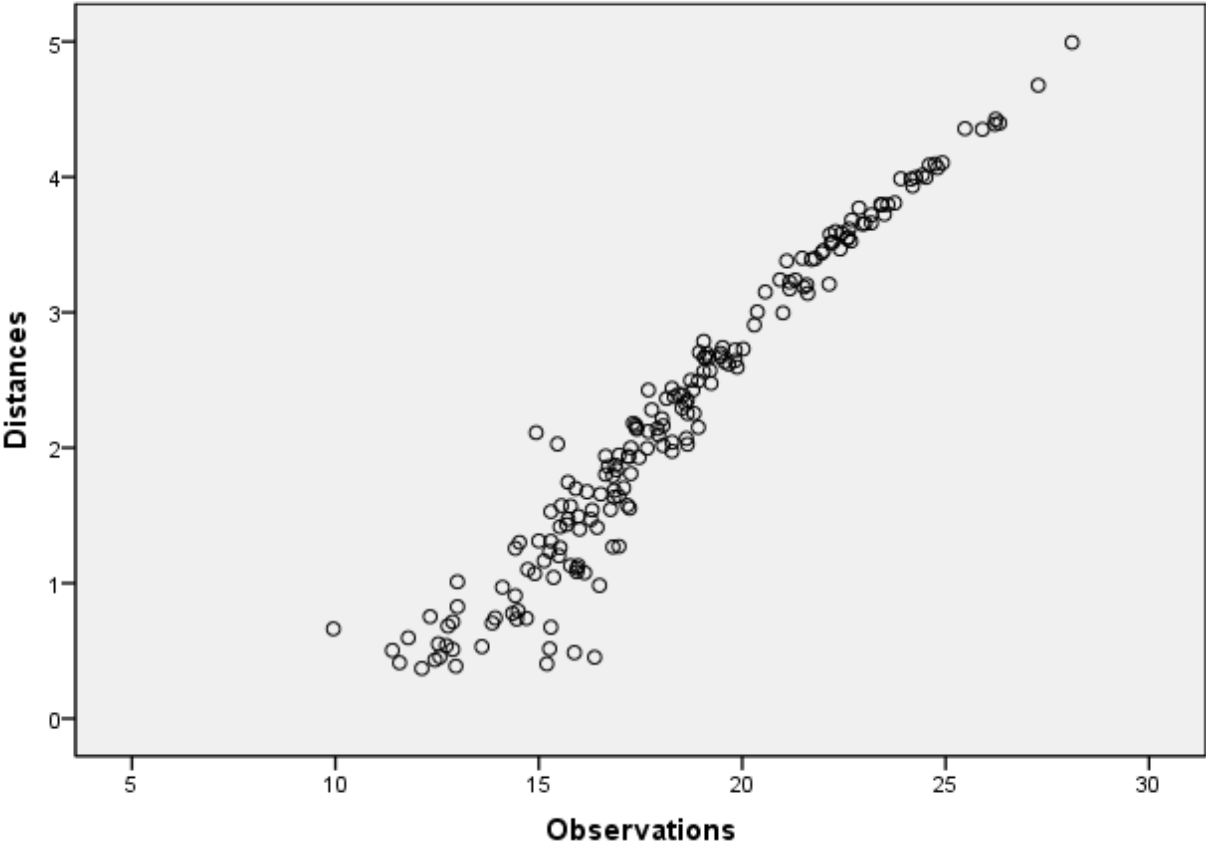

# Transformation Scatterplot

## Euclidean distance model

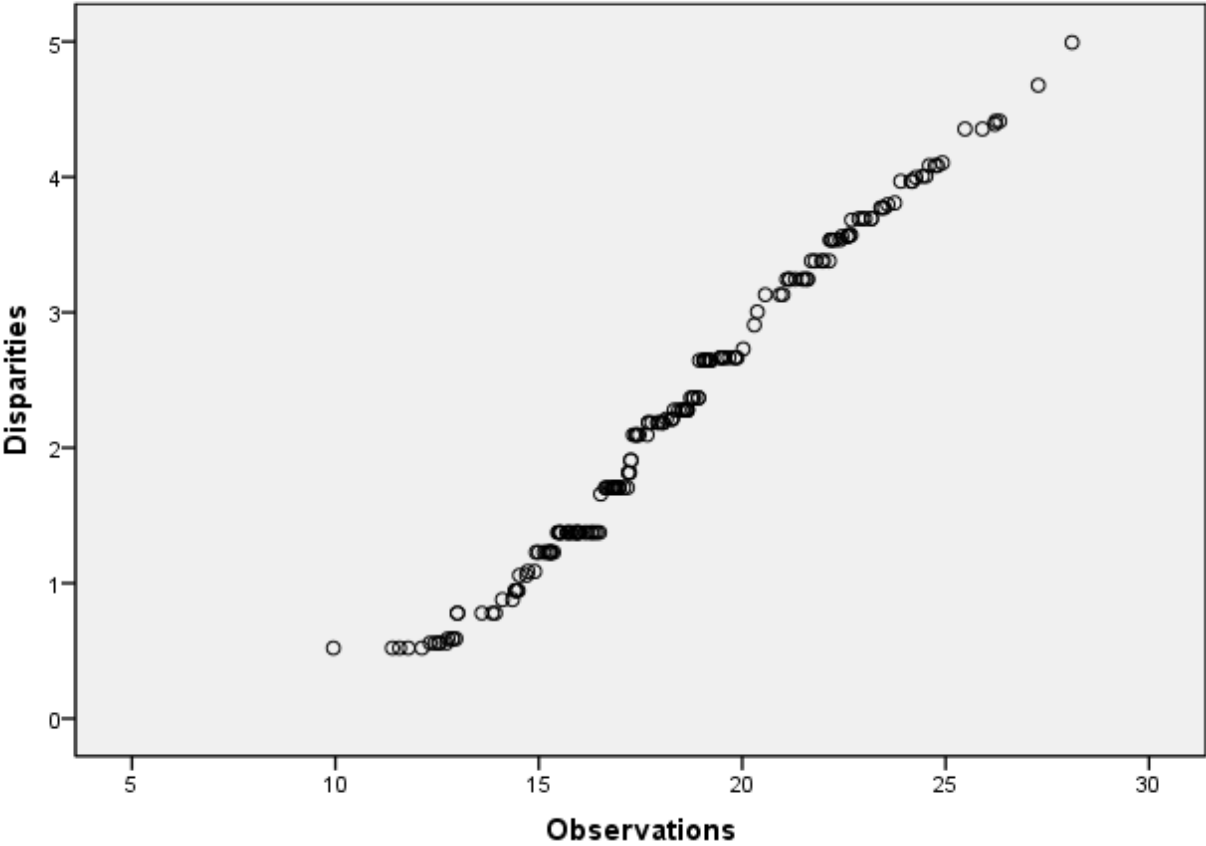



# Derived Stimulus Configuration

## Euclidean distance model

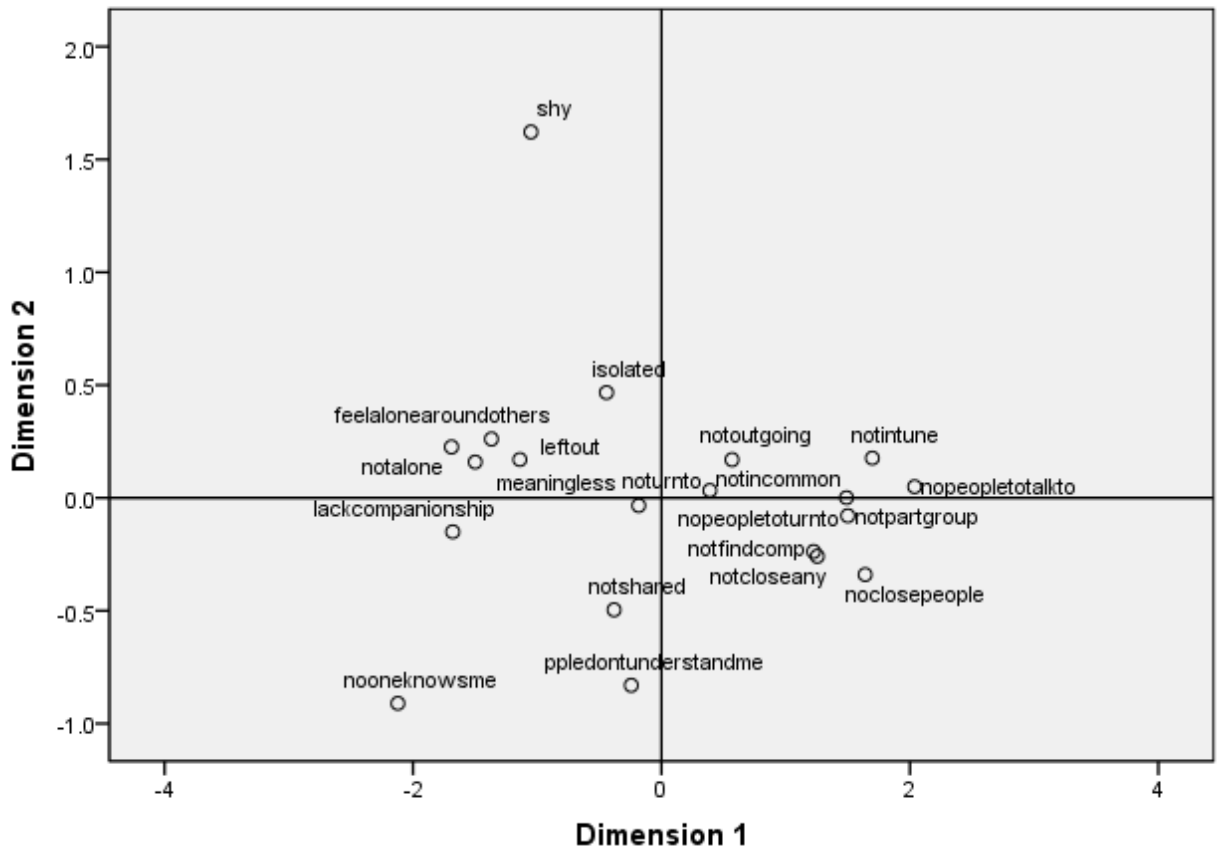

Scatterplot of Linear Fit  
Euclidean distance model

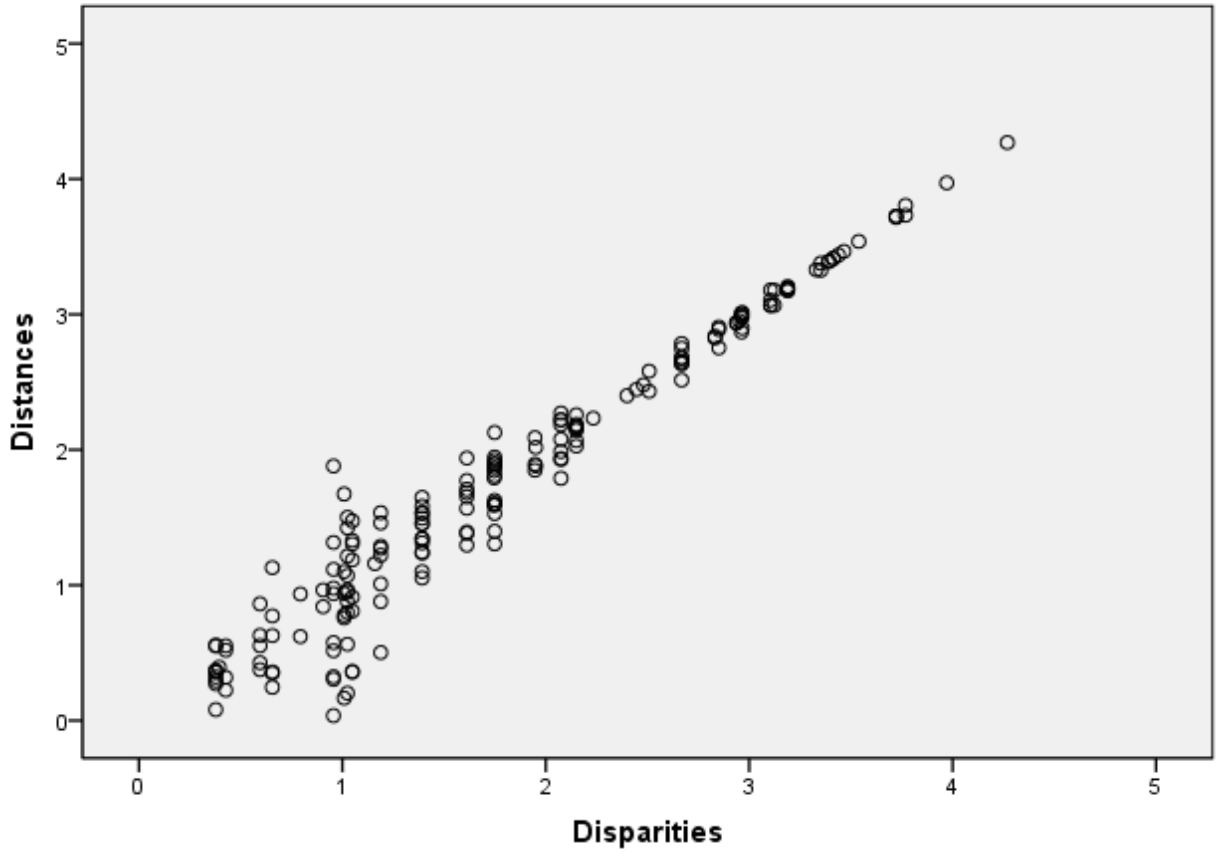

# Scatterplot of Nonlinear Fit

## Euclidean distance model

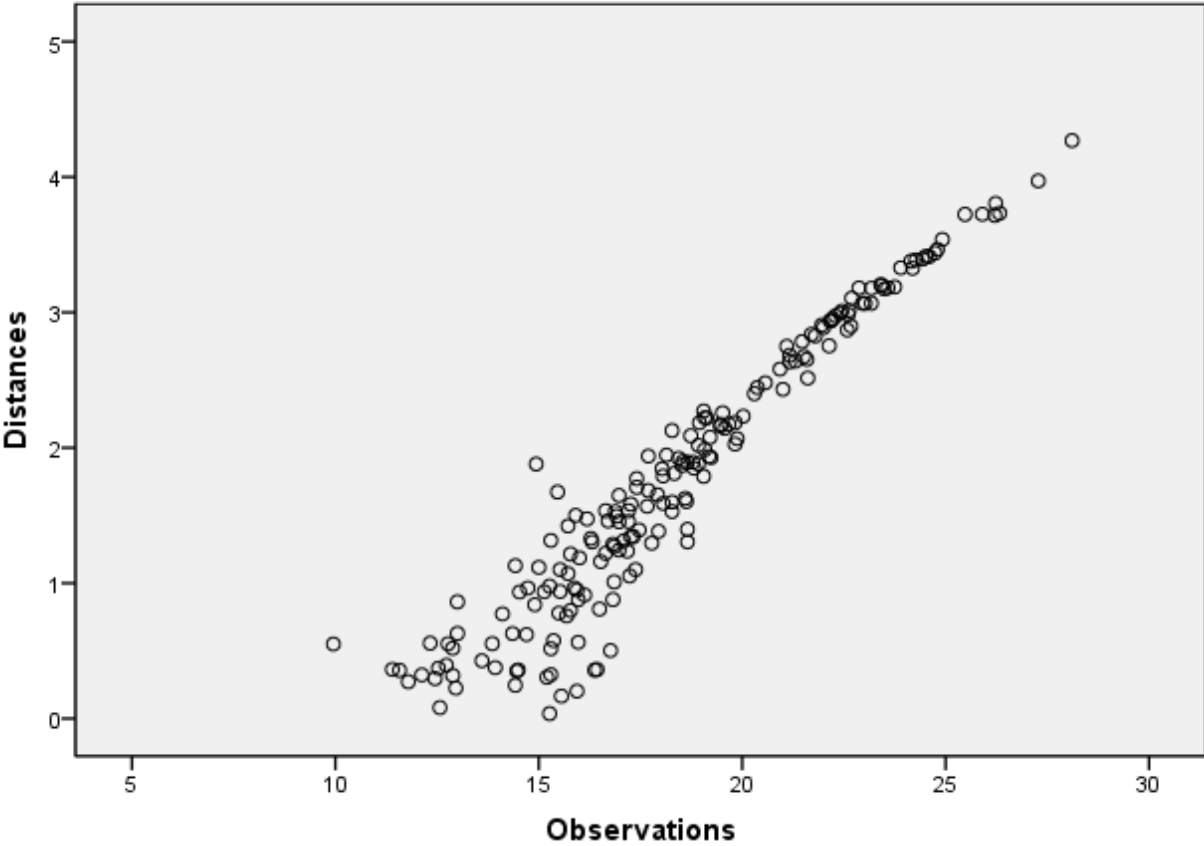

# Transformation Scatterplot

## Euclidean distance model

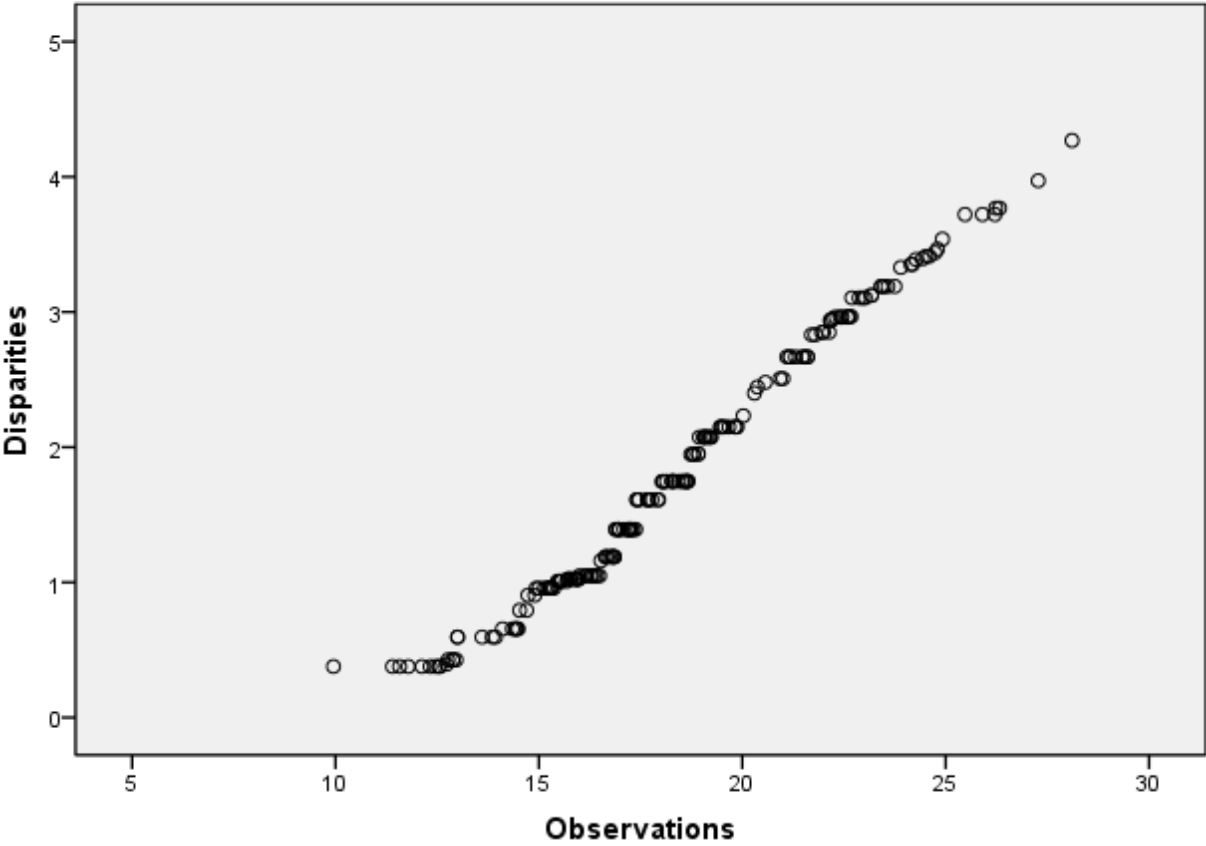

Alscal Procedure Options

Data Options-

Number of Rows (Observations/Matrix). 20  
Number of Columns (Variables) . . . 20  
Number of Matrices . . . . . 1  
Measurement Level . . . . . Ordinal  
Data Matrix Shape . . . . . Symmetric  
Type . . . . . Dissimilarity  
Approach to Ties . . . . . Leave Tied  
Conditionality . . . . . Matrix  
Data Cutoff at . . . . . .000000

Model Options-

Model . . . . . Euclid  
Maximum Dimensionality . . . . . 3  
Minimum Dimensionality . . . . . 2  
Negative Weights . . . . . Not Permitted

Output Options-

Job Option Header . . . . . Printed  
Data Matrices . . . . . Printed  
Configurations and Transformations . . . . . Plotted  
Output Dataset . . . . . Not Created  
Initial Stimulus Coordinates . . . . . Computed

Algorithmic Options-

Maximum Iterations . . . . . 30  
Convergence Criterion . . . . . .00100  
Minimum S-stress . . . . . .00500  
Missing Data Estimated by . . . . . Ulbounds  
Tiestore . . . . . 190

Raw (unscaled) Data for Subject 1

|   | 1      | 2      | 3    | 4 | 5 | 6 | 7 | 8 | 9 | 10 |
|---|--------|--------|------|---|---|---|---|---|---|----|
| 1 | .000   |        |      |   |   |   |   |   |   |    |
| 2 | 24.434 | .000   |      |   |   |   |   |   |   |    |
| 3 | 18.655 | 15.906 | .000 |   |   |   |   |   |   |    |

|    |        |        |        |        |        |        |        |        |        |        |
|----|--------|--------|--------|--------|--------|--------|--------|--------|--------|--------|
| 4  | 24.269 | 13.928 | 16.882 | .000   |        |        |        |        |        |        |
| 5  | 12.124 | 23.580 | 17.692 | 23.409 | .000   |        |        |        |        |        |
| 6  | 15.297 | 19.209 | 15.362 | 18.735 | 15.000 | .000   |        |        |        |        |
| 7  | 14.697 | 22.159 | 17.205 | 22.605 | 15.199 | 16.125 | .000   |        |        |        |
| 8  | 18.947 | 17.321 | 16.763 | 16.912 | 19.235 | 14.526 | 17.916 | .000   |        |        |
| 9  | 14.422 | 19.053 | 15.492 | 19.519 | 14.731 | 12.961 | 16.492 | 16.523 | .000   |        |
| 10 | 12.884 | 24.187 | 18.815 | 24.145 | 12.450 | 16.310 | 12.728 | 19.824 | 16.000 | .000   |
| 11 | 21.703 | 14.353 | 15.264 | 13.856 | 21.587 | 16.643 | 21.000 | 16.852 | 17.407 | 21.794 |
| 12 | 23.431 | 16.371 | 16.279 | 15.937 | 22.450 | 18.788 | 21.471 | 17.776 | 19.875 | 23.173 |
| 13 | 27.276 | 16.823 | 18.276 | 15.780 | 26.211 | 21.166 | 24.739 | 19.053 | 22.672 | 26.230 |
| 14 | 19.468 | 17.944 | 15.969 | 16.852 | 18.921 | 15.524 | 18.028 | 15.875 | 17.234 | 20.025 |
| 15 | 13.000 | 21.954 | 15.716 | 22.226 | 12.884 | 15.969 | 15.264 | 18.601 | 14.107 | 13.601 |
| 16 | 19.824 | 18.055 | 15.780 | 18.055 | 18.547 | 15.716 | 18.628 | 16.432 | 16.823 | 18.138 |
| 17 | 22.694 | 18.921 | 18.520 | 17.205 | 23.022 | 19.570 | 22.293 | 19.131 | 19.672 | 23.896 |
| 18 | 22.956 | 15.297 | 16.643 | 15.297 | 22.000 | 17.407 | 21.517 | 16.971 | 17.692 | 23.173 |
| 19 | 11.402 | 25.475 | 19.079 | 26.325 | 12.767 | 16.971 | 14.900 | 20.567 | 16.186 | 12.329 |
| 20 | 11.790 | 23.495 | 15.460 | 23.749 | 12.570 | 15.524 | 14.457 | 19.183 | 15.133 | 12.530 |
|    | 11     | 12     | 13     | 14     | 15     | 16     | 17     | 18     | 19     | 20     |
| 11 | .000   |        |        |        |        |        |        |        |        |        |
| 12 | 14.491 | .000   |        |        |        |        |        |        |        |        |
| 13 | 16.703 | 17.176 | .000   |        |        |        |        |        |        |        |
| 14 | 15.684 | 17.378 | 19.468 | .000   |        |        |        |        |        |        |
| 15 | 20.298 | 22.136 | 24.515 | 18.330 | .000   |        |        |        |        |        |
| 16 | 17.263 | 18.276 | 14.933 | 17.088 | 17.263 | .000   |        |        |        |        |
| 17 | 16.971 | 18.276 | 21.095 | 18.655 | 22.181 | 20.928 | .000   |        |        |        |
| 18 | 14.422 | 15.556 | 17.464 | 15.937 | 21.307 | 17.664 | 18.655 | .000   |        |        |
| 19 | 22.869 | 24.920 | 28.107 | 21.610 | 13.000 | 20.372 | 24.799 | 24.597 | .000   |        |
| 20 | 21.166 | 22.405 | 25.904 | 19.079 | 11.576 | 18.439 | 22.627 | 22.583 | 9.950  | .000   |

Iteration history for the 3 dimensional solution (in squared distances)

Young's S-stress formula 1 is used.

| Iteration | S-stress | Improvement |
|-----------|----------|-------------|
| 1         | .10691   |             |
| 2         | .07453   | .03238      |
| 3         | .07091   | .00361      |
| 4         | .06965   | .00126      |
| 5         | .06895   | .00070      |

Iterations stopped because  
S-stress improvement is less than .001000

Stress and squared correlation (RSQ) in distances

RSQ values are the proportion of variance of the scaled data (disparities) in the partition (row, matrix, or entire data) which is accounted for by their corresponding distances.

Stress values are Kruskal's stress formula 1.

For matrix  
 Stress = .08034 RSQ = .96862

Configuration derived in 3 dimensions

Stimulus Coordinates

| Stimulus<br>Number | Stimulus<br>Name | Dimension |         |        |
|--------------------|------------------|-----------|---------|--------|
|                    |                  | 1         | 2       | 3      |
| 1                  | notintun         | 1.9893    | -.2504  | .0936  |
| 2                  | lackcomp         | -1.9608   | .0578   | -.5619 |
| 3                  | noturnto         | -.2652    | .1143   | -.4703 |
| 4                  | notalone         | -2.0074   | -.2574  | .1089  |
| 5                  | notpartg         | 1.7781    | .0531   | .0971  |
| 6                  | notincom         | .4794     | -.0618  | .2378  |
| 7                  | notclose         | 1.5031    | .2672   | .3020  |
| 8                  | notshare         | -.5006    | .1962   | 1.0540 |
| 9                  | notoutgo         | .7329     | -.2950  | .0605  |
| 10                 | noclosep         | 1.9116    | .4543   | .0036  |
| 11                 | leftout          | -1.3865   | -.3342  | -.2152 |
| 12                 | meaningl         | -1.6661   | -.0305  | -.8940 |
| 13                 | noonekno         | -2.4428   | 1.1971  | -.2850 |
| 14                 | isolated         | -.5449    | -.2764  | .9440  |
| 15                 | notfindc         | 1.4513    | .2978   | -.2101 |
| 16                 | ppledont         | -.3528    | 1.1334  | .0090  |
| 17                 | shy              | -1.2374   | -1.9599 | -.3852 |
| 18                 | feelalon         | -1.6178   | -.2671  | .6600  |
| 19                 | nopeople         | 2.3776    | -.1039  | -.1920 |
| 20                 | nopeop_1         | 1.7590    | .0654   | -.3567 |

Optimally scaled data (disparities) for subject 1

|   | 1     | 2     | 3     | 4     | 5     | 6     | 7     | 8    | 9 | 10 |
|---|-------|-------|-------|-------|-------|-------|-------|------|---|----|
| 1 | .000  |       |       |       |       |       |       |      |   |    |
| 2 | 4.007 | .000  |       |       |       |       |       |      |   |    |
| 3 | 2.280 | 1.374 | .000  |       |       |       |       |      |   |    |
| 4 | 3.997 | .779  | 1.705 | .000  |       |       |       |      |   |    |
| 5 | .521  | 3.796 | 2.186 | 3.772 | .000  |       |       |      |   |    |
| 6 | 1.228 | 2.646 | 1.228 | 2.369 | 1.228 | .000  |       |      |   |    |
| 7 | 1.058 | 3.535 | 1.816 | 3.561 | 1.228 | 1.374 | .000  |      |   |    |
| 8 | 2.646 | 2.096 | 1.703 | 1.705 | 2.646 | 1.058 | 2.186 | .000 |   |    |

|    |       |       |       |       |       |       |       |       |       |       |
|----|-------|-------|-------|-------|-------|-------|-------|-------|-------|-------|
| 9  | .946  | 2.646 | 1.374 | 2.666 | 1.087 | .589  | 1.374 | 1.658 | .000  |       |
| 10 | .589  | 3.968 | 2.369 | 3.968 | .558  | 1.374 | .558  | 2.666 | 1.374 | .000  |
| 11 | 3.380 | .879  | 1.228 | .779  | 3.245 | 1.703 | 3.131 | 1.703 | 2.096 | 3.380 |
| 12 | 3.772 | 1.374 | 1.374 | 1.374 | 3.561 | 2.369 | 3.245 | 2.186 | 2.666 | 3.693 |
| 13 | 4.678 | 1.703 | 2.213 | 1.374 | 4.390 | 3.245 | 4.084 | 2.646 | 3.571 | 4.412 |
| 14 | 2.666 | 2.186 | 1.374 | 1.703 | 2.369 | 1.374 | 2.186 | 1.374 | 1.816 | 2.730 |
| 15 | .779  | 3.380 | 1.374 | 3.535 | .589  | 1.374 | 1.228 | 2.280 | .879  | .779  |
| 16 | 2.666 | 2.186 | 1.374 | 2.186 | 2.280 | 1.374 | 2.280 | 1.374 | 1.703 | 2.213 |
| 17 | 3.683 | 2.369 | 2.280 | 1.816 | 3.693 | 2.666 | 3.535 | 2.646 | 2.666 | 3.968 |
| 18 | 3.693 | 1.228 | 1.703 | 1.228 | 3.380 | 2.096 | 3.245 | 1.705 | 2.186 | 3.693 |
| 19 | .521  | 4.355 | 2.646 | 4.412 | .589  | 1.705 | 1.087 | 3.131 | 1.374 | .558  |
| 20 | .521  | 3.772 | 1.374 | 3.809 | .558  | 1.374 | .946  | 2.646 | 1.228 | .558  |

11 12 13 14 15 16 17 18 19 20

|    |       |       |       |       |       |       |       |       |      |      |
|----|-------|-------|-------|-------|-------|-------|-------|-------|------|------|
| 11 | .000  |       |       |       |       |       |       |       |      |      |
| 12 | .946  | .000  |       |       |       |       |       |       |      |      |
| 13 | 1.703 | 1.705 | .000  |       |       |       |       |       |      |      |
| 14 | 1.374 | 2.096 | 2.666 | .000  |       |       |       |       |      |      |
| 15 | 2.907 | 3.380 | 4.007 | 2.280 | .000  |       |       |       |      |      |
| 16 | 1.907 | 2.213 | 1.228 | 1.705 | 1.907 | .000  |       |       |      |      |
| 17 | 1.705 | 2.213 | 3.245 | 2.280 | 3.535 | 3.131 | .000  |       |      |      |
| 18 | .946  | 1.374 | 2.096 | 1.374 | 3.245 | 2.096 | 2.280 | .000  |      |      |
| 19 | 3.693 | 4.105 | 4.994 | 3.245 | .779  | 3.004 | 4.084 | 4.084 | .000 |      |
| 20 | 3.245 | 3.535 | 4.355 | 2.646 | .521  | 2.280 | 3.571 | 3.561 | .521 | .000 |

Iteration history for the 2 dimensional solution (in squared distances)

Young's S-stress formula 1 is used.

| Iteration | S-stress | Improvement |
|-----------|----------|-------------|
| 1         | .12307   |             |
| 2         | .09408   | .02899      |
| 3         | .09096   | .00312      |
| 4         | .09003   | .00093      |

Iterations stopped because  
S-stress improvement is less than .001000

Stress and squared correlation (RSQ) in distances

RSQ values are the proportion of variance of the scaled data (disparities)  
in the partition (row, matrix, or entire data) which  
is accounted for by their corresponding distances.  
Stress values are Kruskal's stress formula 1.

For matrix  
Stress = .11620 RSQ = .94653



Configuration derived in 2 dimensions

Stimulus Coordinates

| Stimulus<br>Number | Stimulus<br>Name | Dimension |        |
|--------------------|------------------|-----------|--------|
|                    |                  | 1         | 2      |
| 1                  | notintun         | 1.6975    | .1766  |
| 2                  | lackcomp         | -1.6805   | -.1500 |
| 3                  | noturnto         | -.1835    | -.0337 |
| 4                  | notalone         | -1.6905   | .2259  |
| 5                  | notpartg         | 1.5005    | -.0787 |
| 6                  | notincom         | .3895     | .0330  |
| 7                  | notclose         | 1.2545    | -.2585 |
| 8                  | notshare         | -.3814    | -.4957 |
| 9                  | notoutgo         | .5683     | .1696  |
| 10                 | noclosep         | 1.6397    | -.3400 |
| 11                 | leftout          | -1.1399   | .1700  |
| 12                 | meaningl         | -1.4992   | .1593  |
| 13                 | noonekno         | -2.1219   | -.9103 |
| 14                 | isolated         | -.4424    | .4672  |
| 15                 | notfindc         | 1.2247    | -.2376 |
| 16                 | ppledont         | -.2434    | -.8302 |
| 17                 | shy              | -1.0508   | 1.6215 |
| 18                 | feelalon         | -1.3684   | .2609  |
| 19                 | nopeople         | 2.0378    | .0495  |
| 20                 | nopeop_1         | 1.4895    | .0012  |

Optimally scaled data (disparities) for subject 1

|    | 1     | 2     | 3     | 4     | 5     | 6     | 7     | 8     | 9     | 10    |
|----|-------|-------|-------|-------|-------|-------|-------|-------|-------|-------|
| 1  | .000  |       |       |       |       |       |       |       |       |       |
| 2  | 3.394 | .000  |       |       |       |       |       |       |       |       |
| 3  | 1.748 | 1.025 | .000  |       |       |       |       |       |       |       |
| 4  | 3.388 | .595  | 1.392 | .000  |       |       |       |       |       |       |
| 5  | .378  | 3.189 | 1.612 | 3.189 | .000  |       |       |       |       |       |
| 6  | .956  | 2.075 | .956  | 1.946 | .956  | .000  |       |       |       |       |
| 7  | .794  | 2.937 | 1.392 | 2.966 | .956  | 1.049 | .000  |       |       |       |
| 8  | 2.075 | 1.392 | 1.188 | 1.392 | 2.075 | .794  | 1.612 | .000  |       |       |
| 9  | .656  | 2.075 | 1.008 | 2.150 | .905  | .426  | 1.049 | 1.160 | .000  |       |
| 10 | .426  | 3.352 | 1.946 | 3.352 | .378  | 1.049 | .394  | 2.150 | 1.049 | .000  |
| 11 | 2.832 | .656  | .956  | .595  | 2.668 | 1.188 | 2.508 | 1.188 | 1.612 | 2.832 |
| 12 | 3.189 | 1.049 | 1.049 | 1.025 | 2.962 | 1.946 | 2.668 | 1.612 | 2.150 | 3.123 |
| 13 | 3.971 | 1.188 | 1.748 | 1.025 | 3.722 | 2.668 | 3.439 | 2.075 | 2.966 | 3.769 |
| 14 | 2.150 | 1.612 | 1.025 | 1.188 | 1.950 | 1.008 | 1.746 | 1.025 | 1.392 | 2.233 |
| 15 | .595  | 2.850 | 1.025 | 2.952 | .426  | 1.025 | .956  | 1.748 | .656  | .595  |

|    |       |       |       |       |       |       |       |       |       |       |
|----|-------|-------|-------|-------|-------|-------|-------|-------|-------|-------|
| 16 | 2.150 | 1.746 | 1.025 | 1.746 | 1.748 | 1.025 | 1.748 | 1.049 | 1.188 | 1.748 |
| 17 | 3.105 | 1.950 | 1.748 | 1.392 | 3.105 | 2.150 | 2.962 | 2.075 | 2.150 | 3.330 |
| 18 | 3.105 | .956  | 1.188 | .956  | 2.850 | 1.612 | 2.668 | 1.392 | 1.612 | 3.123 |
| 19 | .378  | 3.722 | 2.075 | 3.769 | .426  | 1.392 | .905  | 2.480 | 1.049 | .378  |
| 20 | .378  | 3.189 | 1.008 | 3.189 | .378  | 1.008 | .656  | 2.075 | .956  | .378  |
|    | 11    | 12    | 13    | 14    | 15    | 16    | 17    | 18    | 19    | 20    |
| 11 | .000  |       |       |       |       |       |       |       |       |       |
| 12 | .656  | .000  |       |       |       |       |       |       |       |       |
| 13 | 1.188 | 1.392 | .000  |       |       |       |       |       |       |       |
| 14 | 1.008 | 1.392 | 2.150 | .000  |       |       |       |       |       |       |
| 15 | 2.400 | 2.850 | 3.413 | 1.748 | .000  |       |       |       |       |       |
| 16 | 1.392 | 1.748 | .956  | 1.392 | 1.392 | .000  |       |       |       |       |
| 17 | 1.392 | 1.748 | 2.668 | 1.748 | 2.938 | 2.508 | .000  |       |       |       |
| 18 | .656  | 1.008 | 1.612 | 1.025 | 2.668 | 1.612 | 1.748 | .000  |       |       |
| 19 | 3.105 | 3.539 | 4.269 | 2.668 | .595  | 2.445 | 3.466 | 3.413 | .000  |       |
| 20 | 2.668 | 2.962 | 3.722 | 2.075 | .378  | 1.748 | 2.966 | 2.962 | .378  | .000  |

| Abbreviated Name | Extended Name            |
|------------------|--------------------------|
| feelalon         | feelaloneyouaroundothers |
| lackcomp         | lackcompanionship        |
| meaningl         | meaningless              |
| noclosep         | noclosepeople            |
| noonekno         | nooneknowsme             |
| nopeop_1         | nopeopletoturnto         |
| nopeople         | nopeopletotalkto         |
| notclose         | notcloseany              |
| notfindc         | notfindcomp              |
| notincom         | notincommon              |
| notintun         | notintune                |
| notoutgo         | notoutgoing              |
| notpartg         | notpartgroup             |
| notshare         | notshared                |
| ppledont         | ppledontunderstandme     |
